# Supplementary material for: Measuring global health inequity
Source: PubMed Central journal article supplement (PMC2147004; doi:10.1186/1475-9276-6-16), 2007-10-30
Supplement: 1475-9276-6-16-S1.pdf [file 1475-9276-6-16-S1.pdf]

WHO Regions and mortality subregions used in epidemiological analyses and reporting for the World Health Report 2000<sup>1</sup>.

| <b>Region</b> | <b>Sub-Region</b> | <b>Mortality Type</b>         | <b>WHO Member State</b>                                                                                                                                                                                                                                                                                                          |
|---------------|-------------------|-------------------------------|----------------------------------------------------------------------------------------------------------------------------------------------------------------------------------------------------------------------------------------------------------------------------------------------------------------------------------|
| AFRO          | D                 | High Child<br>High Adult      | Algeria, Angola, Benin, Burkina Faso, Cameroon, Cape Verde, Chad, Comoros, Equatorial Guinea, Gabon, Gambia, Ghana, Guinea, Guinea-Bissau, Liberia, Madagascar, Mali, Mauritania, Mauritius, Niger, Nigeria, Sao Tome and Principe, Senegal, Seychelles, Sierra Leone, Togo                                                      |
| AFRO          | E                 | High Child<br>Very High Adult | Botswana, Burundi, Central African Republic, Congo, Côte d'Ivoire, Democratic Republic of Congo, Eritrea, Ethiopia, Kenya, Lesotho, Malawi, Mozambique, Namibia, Rwanda, South Africa, Swaziland, Uganda, United Republic of Tanzania, Zambia, Zimbabwe                                                                          |
| AMRO          | A                 | Very Low Child<br>Low Adult   | Canada, Cuba, United States of America                                                                                                                                                                                                                                                                                           |
| AMRO          | B                 | Low Child<br>Low Adult        | Antigua and Barbuda, Argentina, Bahamas, Barbados, Belize, Brazil, Chile, Colombia, Costa Rica, Dominica, Dominican Republic, El Salvador, Grenada, Guyana, Honduras, Jamaica, Mexico, Panama, Paraguay, Saint Kitts and Nevis, Saint Lucia, Saint Vincent and the Grenadines, Suriname, Trinidad and Tobago, Uruguay, Venezuela |
| AMRO          | D                 | High Child<br>High Adult      | Bolivia, Ecuador, Guatemala, Haiti, Nicaragua, Peru                                                                                                                                                                                                                                                                              |
| EMRO          | B                 | Low Child<br>Low Adult        | Bahrain, Cyprus, Iran (Islamic Republic of), Jordan, Kuwait, Lebanon, Libyan Arab Jamahiriya, Oman, Qatar, Saudi Arabia, Syrian Arab Republic, Tunisia, United Arab Emirates                                                                                                                                                     |
| EMRO          | D                 | High Child<br>High Adult      | Afghanistan, Azerbaijan, Djibouti, Egypt, Iraq, Morocco, Pakistan, Somalia, Sudan, Yemen                                                                                                                                                                                                                                         |
| EURO          | A                 | Very Low Child<br>Low Adult   | Andorra, Austria, Belgium, Croatia, Czech Republic, Denmark, Finland, France, Germany, Greece, Iceland, Ireland, Israel, Italy, Luxembourg, Malta, Monaco, Netherlands, Norway, Portugal, San Marino, Slovenia, Spain, Sweden, Switzerland, United Kingdom                                                                       |
| EURO          | B                 | Low Child<br>Low Adult        | Albania, Armenia, Bosnia and Herzegovina, Bulgaria, Georgia, Kyrgyzstan, Poland, Romania, Slovakia, Tajikistan, The Former Yugoslav Republic of Macedonia, Turkey, Turkmenistan, Uzbekistan, Yugoslavia                                                                                                                          |
| EURO          | C                 | Low child<br>High adult       | Belarus, Estonia, Hungary, Kazakhstan, Latvia, Lithuania, Republic of Moldova, Russian Federation, Ukraine                                                                                                                                                                                                                       |
| SEARO         | B                 | Low child<br>Low adult        | Indonesia, Sri Lanka, Thailand                                                                                                                                                                                                                                                                                                   |
| SEARO         | D                 | High child<br>High adult      | Bangladesh, Bhutan, Democratic People's Republic of Korea, India, Maldives, Myanmar, Nepal                                                                                                                                                                                                                                       |
| WPRO          | A                 | Very low child<br>Low adult   | Australia, Brunei Darussalam, Japan, New Zealand, Singapore                                                                                                                                                                                                                                                                      |
| WPRO          | B                 | Low Child<br>Low Adult        | Cambodia, China, Cook Islands, Fiji, Kiribati, Lao People's Democratic Republic, Malaysia, Marshall Islands, Micronesia (Federated States of), Mongolia, Nauru, Niue, Palau, Papua New Guinea, Philippines, Republic of Korea, Samoa, Solomon Islands, Tonga, Tuvalu, Vanuatu, Viet Nam                                          |
|               |                   |                               |                                                                                                                                                                                                                                                                                                                                  |

<sup>1</sup> Mathers CD, Sadana R, Salomon JA, Murray CJL, Lopez AD (2000). Estimates of DALE for 191 countries: methods and results. *Global Programme on Evidence for Health Policy Working Paper No. 16*. Geneva: World Health Organization
